# Supplementary material for: Importance of Basic Research on the Causes of Feather Pecking in Relation to Welfare
Source: PubMed Central journal article supplement (PMC7070775; doi:10.3390/ani10020213), 2020-01-28
Supplement: animals-10-00213-s001.pdf [file animals-10-00213-s001.pdf]

Supplementary material

**Table S1 | A non-systematic overview of publications on topics relating feather pecking in laying hens.** Expansion on Table 1.

**Abbreviations:** serotonin (5-HT); somatodendritic 5-HT<sub>1A</sub> autoreceptor agonist (S-15535); Aggressive pecking (AP); beak trimming (BT); body weight (BW); corticosterone (CORT); Dopamine (DA); Emerge box (EB); environmental enrichment (EE); extreme feather pecking (EFP); feather pecking (FP); gentle feather pecking (GFP); high feather pecking (HFP); heterophil/lymphocyte (H/L) ratio; heart rate variability (HRV); human serum albumin (HuSA); low feather pecking (LFP); lipopolysaccharide (LPS); novel object (NO); open field (OF); plumage damage (PD) parent-stock (PS); Tonic immobility (TI); L-tryptophan (TRP).

**Strain(-type)s:** Columbian Blacktail (CB); Dekalb White (DW); ISA brown (ISA); Lohmann Brown (LB); Lohmann Brown-Classic (LBC); Lohmann Selected Leghorn (LSL); Norbrid 41 (NB); New Hampshire (NH); Rhode Island Red (RIR); Rhode Island White (RIW); White Leghorn (WL); Warren SSL (WSSL).

| Reference                                    | Experiment                                                                                                                                              | Subjects                                  | Measured                                                                                                                                                                                                    | Results / Conclusion(s)                                                                                                                                                                                                                                                                                                                                                                                                                                                                                                                   |
|----------------------------------------------|---------------------------------------------------------------------------------------------------------------------------------------------------------|-------------------------------------------|-------------------------------------------------------------------------------------------------------------------------------------------------------------------------------------------------------------|-------------------------------------------------------------------------------------------------------------------------------------------------------------------------------------------------------------------------------------------------------------------------------------------------------------------------------------------------------------------------------------------------------------------------------------------------------------------------------------------------------------------------------------------|
| <b>Environment</b>                           |                                                                                                                                                         |                                           |                                                                                                                                                                                                             |                                                                                                                                                                                                                                                                                                                                                                                                                                                                                                                                           |
| <b>Blokhuis &amp; van der Haar, 1989 [1]</b> | 2*2 Factorial design: litter / wire floors<br>* BT / non-BT in rearing period                                                                           | <i>Gallus gallus domesticus</i><br>(WSSL) | <ul style="list-style-type: none"> <li>▪ Behavior</li> <li>▪ Plumage quality</li> </ul>                                                                                                                     | <ul style="list-style-type: none"> <li>▪ Effect of experiences during rearing on pecking preference in the laying period</li> <li>▪ No effect of BT on pecking preference or frequency of FP</li> </ul>                                                                                                                                                                                                                                                                                                                                   |
| <b>El-Lethey et al., 2000 [2]</b>            | <ul style="list-style-type: none"> <li>▪ 2*2 Factorial design: foraging material (long-cut straw (y/n)) *</li> <li>▪ Physical restraint test</li> </ul> | <i>Gallus gallus domesticus</i><br>(LSL)  | <ul style="list-style-type: none"> <li>▪ Behavior</li> <li>- TI</li> <li>▪ BW</li> <li>▪ Egg production</li> <li>▪ H/L ratio</li> <li>▪ Antibody titers to sheep red blood cells (SRBC), tetanus</li> </ul> | <ul style="list-style-type: none"> <li>▪ Foraging material and food type affected both FP and stress indicators, suggesting an association</li> <li>- Negative effect of foraging material on FP</li> <li>- More FP in groups fed on pellets than on mash</li> <li>- Positive effect of foraging material on egg production</li> <li>- No effect of food type on egg production</li> <li>- Negative effect of foraging material on TI and H/L ratios</li> <li>- Higher TI and H/L ratios in groups fed on pellets than on mash</li> </ul> |

| Reference                      | Experiment                                                                                                                                       | Subjects                                       | Measured                                                                                                                                               | Results / Conclusion(s)                                                                                                                                                                                                                                                                                                                                                                                                                                                                                                      |
|--------------------------------|--------------------------------------------------------------------------------------------------------------------------------------------------|------------------------------------------------|--------------------------------------------------------------------------------------------------------------------------------------------------------|------------------------------------------------------------------------------------------------------------------------------------------------------------------------------------------------------------------------------------------------------------------------------------------------------------------------------------------------------------------------------------------------------------------------------------------------------------------------------------------------------------------------------|
|                                |                                                                                                                                                  |                                                | toxoid (TT) and human serum albumin (HSA)                                                                                                              | <ul style="list-style-type: none"> <li>- Positive effect of foraging material on antibody titers to SRBC and TT</li> <li>- No effect of food type on antibody titers</li> </ul>                                                                                                                                                                                                                                                                                                                                              |
| Riedstra & Groothuis, 2004 [3] | 2*2 Factorial design: light / dark during incubation * housed with familiar conspecifics / housed with both familiar and unfamiliar conspecifics | <i>Gallus gallus domesticus</i>                | <ul style="list-style-type: none"> <li>▪ Behavior</li> <li>- Frequency of FP</li> <li>- Social orientation of FP</li> </ul>                            | <ul style="list-style-type: none"> <li>▪ Light-exposure during incubation: more FP, no FP preference</li> <li>▪ No light-exposure during incubation: less FP, FP preference for unfamiliar over familiar peers</li> </ul>                                                                                                                                                                                                                                                                                                    |
| van Hierden et al., 2004[4]    | 2*2 Factorial design: line (LFP / HFP) * diet (low TRP (control) /high TRP) Physical restraint test                                              | <i>Gallus gallus domesticus</i> (WL; HFP, LFP) | <ul style="list-style-type: none"> <li>▪ Behavior</li> <li>▪ plasma-CORT</li> <li>▪ TRP and other large amino acids (LNAAs)</li> <li>▪ 5-HT</li> </ul> | <ul style="list-style-type: none"> <li>▪ No significant interactions effects of line * treatment</li> <li>▪ Negative effect of TRP on frequency GFP (sign.) and SFP (not sign.)</li> <li>▪ HFP higher levels of GFP and SFP than LFP</li> <li>▪ Positive effect of TRP on plasma-TRP/LNAA ratio</li> <li>▪ Positive effect of TRP on baseline and stress-induced plasma-CORT</li> <li>▪ Positive effect of TRP on 5-HT turnover in the forebrain</li> <li>▪ FP is triggered by low serotonergic neurotransmission</li> </ul> |
| Chow & Hogan, 2005 [5]         | Repeated experience with exploratory-rich environments vs. no such experience                                                                    | <i>Gallus gallus spadiceus</i>                 | <ul style="list-style-type: none"> <li>▪ Behavior</li> <li>- Frequency of FP</li> </ul>                                                                | <ul style="list-style-type: none"> <li>▪ Effect of experience in the exploratory-rich environments: less GFP, more SFP</li> <li>▪ No effect on frequency of environmental pecking or food pecking</li> </ul>                                                                                                                                                                                                                                                                                                                 |

| Reference                            | Experiment                                                                                                                                                                                                                                                                                                                                                                                 | Subjects                                                                                            | Measured                                                     | Results / Conclusion(s)                                                                                                                                                                                                                                                                                                                                                                                                                                                                                                                                                             |
|--------------------------------------|--------------------------------------------------------------------------------------------------------------------------------------------------------------------------------------------------------------------------------------------------------------------------------------------------------------------------------------------------------------------------------------------|-----------------------------------------------------------------------------------------------------|--------------------------------------------------------------|-------------------------------------------------------------------------------------------------------------------------------------------------------------------------------------------------------------------------------------------------------------------------------------------------------------------------------------------------------------------------------------------------------------------------------------------------------------------------------------------------------------------------------------------------------------------------------------|
| <b>McAdie &amp; Keeling 2005 [6]</b> | <p>1) Experimental condition: device presentation in pen (continuously from 1 day of age / 4 h per day from 1 day of age / from 22 days of age / from 52 days of age / devices never presented)</p> <p>2) Commercial condition: device presentation in pen (continuously from 1 day of age / 24 h per day every 4 weeks / continuously from 16 weeks of age / devices never presented)</p> | <p>1) <i>Gallus gallus domesticus</i> (WL; HFP)</p> <p>2) <i>Gallus gallus domesticus</i> (LSL)</p> | <p>1) Behavior</p> <p>2) Plumage quality</p>                 | <ul style="list-style-type: none"> <li>▪ 'String device an effective enrichment strategy for reducing FP:</li> </ul> <p>1) Negative effect on FP when devices continuously in pen from 1 day of age or when they were presented for 4 h per day</p> <p>1) Highest FP in pens where device was never presented, intermediate when introduction was at 22 or 52 days of age</p> <p>2) Negative effect on PD, all ages</p>                                                                                                                                                             |
| <b>Zimmerman et al., 2006 [7]</b>    | <ul style="list-style-type: none"> <li>▪ Six treatments with variations in stocking density (low / medium / high) * flock size (small / large)</li> <li>* management type (standard / modified: nipple line drinkers, dark nest boxes)</li> <li>▪ Each pen contained one replicate of a treatment</li> </ul>                                                                               | <i>Gallus gallus domesticus</i> (Shavers)                                                           | <ul style="list-style-type: none"> <li>▪ Behavior</li> </ul> | <ul style="list-style-type: none"> <li>▪ No effect of stocking density on welfare</li> <li>▪ Low stocking density: highest initial level of FP and aggression</li> <li>▪ High stocking density: FP increased with age</li> <li>▪ High stocking density: more aggression, preening and allopreening in small flocks than in large flocks</li> <li>▪ High stocking density / small flocks / standard management: highest FP and aggression at the end of the cycle than</li> <li>▪ High stocking density / small flocks / modified management: decreased FP and aggression</li> </ul> |

| Reference                | Experiment                                                                                                                                                                                                                                                                                                                                                | Subjects                                   | Measured                                                                                                                                                                                                                                                                         | Results / Conclusion(s)                                                                                                                                                                                                                                                                                                                                                                                                                                                                                                                                                                                                                                                            |
|--------------------------|-----------------------------------------------------------------------------------------------------------------------------------------------------------------------------------------------------------------------------------------------------------------------------------------------------------------------------------------------------------|--------------------------------------------|----------------------------------------------------------------------------------------------------------------------------------------------------------------------------------------------------------------------------------------------------------------------------------|------------------------------------------------------------------------------------------------------------------------------------------------------------------------------------------------------------------------------------------------------------------------------------------------------------------------------------------------------------------------------------------------------------------------------------------------------------------------------------------------------------------------------------------------------------------------------------------------------------------------------------------------------------------------------------|
| Dixon et al., 2008 [8]   | <ul style="list-style-type: none"> <li>▪ Observe and quantify motor patterns of GFP and SFP (flat / chicken-shaped feather model)</li> <li>▪ Observe and quantify motor patterns of dustbathing ((peat moss / white sand / grey sand) / water) and foraging pecks (flat / chicken-shaped forage)</li> <li>▪ NO test (flat / chicken-shaped NO)</li> </ul> | <i>Gallus gallus domesticus</i> (ISA (WL)) | <ul style="list-style-type: none"> <li>▪ Behavior</li> <li>▪ Duration of head fixation</li> <li>▪ Duration from fixation to contact</li> <li>▪ Duration of the whole peck</li> </ul>                                                                                             | <ul style="list-style-type: none"> <li>▪ Significant variance in peck motor patterns at forages, dust baths, NO and water</li> <li>▪ Peck motor patterns different for all measures for dustbathing and foraging</li> <li>▪ SFP similar to foraging pecks, but unlike all other pecks</li> <li>▪ Thus, SFP derives from frustrated motivations to forage, not to dustbathe</li> </ul>                                                                                                                                                                                                                                                                                              |
| Lambton et al., 2010 [9] | Observation of free range / organic / barn systems, BT and non-BT                                                                                                                                                                                                                                                                                         | <i>Gallus gallus domesticus</i> (CB)       | <ul style="list-style-type: none"> <li>▪ Behavior (GFP/ SFP)</li> <li>▪ Plumage quality</li> <li>▪ Farmer interviews (y/n FP)</li> <li>▪ Environmental and management information</li> <li>- Weather</li> <li>- Inside / outside temperatures</li> <li>- Light levels</li> </ul> | <ul style="list-style-type: none"> <li>▪ GFP rates decreased with increased percentage range use</li> <li>▪ GFP rates decreased with temperature inside the laying house</li> <li>▪ GFP was lower in flocks with straw litter, even compared to saw dust</li> <li>▪ GFP was higher in flocks with soil or grass litter</li> <li>▪ GFP was higher in flocks which had no perch access</li> <li>▪ GFP was higher in flocks which were BT</li> <li>▪ SFP decreased with range use</li> <li>▪ SFP was higher in non-BT</li> <li>▪ SFP was higher in flocks that were observed to be FP when they arrived on farm compared to flocks that were observed not to FP at arrival</li> </ul> |

| Reference                         | Experiment                                                                                                                                                | Subjects                                 | Measured                                                                                                                                                                | Results / Conclusion(s)                                                                                                                                                                                                                                                                                                                                                                                                      |
|-----------------------------------|-----------------------------------------------------------------------------------------------------------------------------------------------------------|------------------------------------------|-------------------------------------------------------------------------------------------------------------------------------------------------------------------------|------------------------------------------------------------------------------------------------------------------------------------------------------------------------------------------------------------------------------------------------------------------------------------------------------------------------------------------------------------------------------------------------------------------------------|
|                                   |                                                                                                                                                           |                                          | <ul style="list-style-type: none"> <li>- Litter type, weight, condensity</li> <li>- Range quality</li> <li>- Range coverage</li> <li>- Range usage</li> </ul>           | <ul style="list-style-type: none"> <li>▪ SFP was higher in flocks fed pelleted compared to those fed mashed food</li> <li>▪ PD was lower in BT compared to non-BT flocks</li> <li>▪ PD was lower in flocks which were fed mashed feed, and showed a quadratic relationship with SFP which was positive over the observed ranges of the behaviors</li> </ul>                                                                  |
| <b>Collins et al., 2011 [10]</b>  | Observation of hen location on wire floor / shavings / perches, peat, nest box and shavings.                                                              | <i>Gallus gallus domesticus</i> (Hyline) | <ul style="list-style-type: none"> <li>▪ Behavior</li> <li>▪ Positional data to calculate feeding synchrony and cluster scores</li> </ul>                               | <ul style="list-style-type: none"> <li>▪ No effect of pen environment on feeding synchrony</li> <li>▪ Resource-use stronger effect on clustering than social cohesion</li> </ul>                                                                                                                                                                                                                                             |
| <b>Gilani et al., 2012 [11]</b>   | <ul style="list-style-type: none"> <li>▪ Dark brooders vs. light (control) during rearing</li> <li>▪ NO test</li> <li>▪ Stationary person test</li> </ul> | <i>Gallus gallus domesticus</i> (CB)     | <ul style="list-style-type: none"> <li>▪ Behavior</li> <li>▪ Plumage quality</li> <li>▪ Bird weights</li> <li>▪ Evenness of body weight</li> <li>▪ Mortality</li> </ul> | <ul style="list-style-type: none"> <li>▪ No detrimental effects of dark brooding:               <ul style="list-style-type: none"> <li>- No effect on weight evenness</li> <li>- Possible reduced smothering during rear</li> <li>- No effect on GFP</li> <li>- Decreased SFP</li> <li>- Decreased PD</li> </ul> </li> <li>▪ Small scale results were similar to those of large-scale studies on commercial farms</li> </ul> |
| <b>Hartcher et al., 2015 [12]</b> | 2*2 Factorial design: EE / no EE * BT / non-BT                                                                                                            | <i>Gallus gallus domesticus</i> (ISA)    | <ul style="list-style-type: none"> <li>▪ Behavior</li> <li>▪ Plumage quality</li> <li>▪ Feed intake</li> </ul>                                                          | <ul style="list-style-type: none"> <li>▪ Negative effect of BT on PD</li> <li>▪ No effect of EE on PD</li> <li>▪ Negative effect of BT on GFP and SFP at 43wk</li> </ul>                                                                                                                                                                                                                                                     |

| Reference                              | Experiment                                                                                                                                                                                                  | Subjects                                                                    | Measured                                                                                                                                                                                                   | Results / Conclusion(s)                                                                                                                                                                                                                                                                                                                                                                                                         |
|----------------------------------------|-------------------------------------------------------------------------------------------------------------------------------------------------------------------------------------------------------------|-----------------------------------------------------------------------------|------------------------------------------------------------------------------------------------------------------------------------------------------------------------------------------------------------|---------------------------------------------------------------------------------------------------------------------------------------------------------------------------------------------------------------------------------------------------------------------------------------------------------------------------------------------------------------------------------------------------------------------------------|
|                                        |                                                                                                                                                                                                             |                                                                             | <ul style="list-style-type: none"> <li>▪ Live body weight</li> <li>▪ Egg production</li> </ul>                                                                                                             | <ul style="list-style-type: none"> <li>▪ Positive effect of BT on GFP during rear and subsequently on PD</li> </ul>                                                                                                                                                                                                                                                                                                             |
| <b>Zepp et al., 2018 [13]</b>          | 3*2 Factorial design: Varying stocking densities * Varying EE (pecking stone / pecking block / lucerne bale)                                                                                                | <i>Gallus gallus domesticus</i> (LBC)                                       | <ul style="list-style-type: none"> <li>▪ Behavior</li> <li>▪ Plumage quality</li> <li>▪ Age</li> </ul>                                                                                                     | <ul style="list-style-type: none"> <li>▪ Positive effect of stocking density on FP</li> <li>▪ Negative effect of EE on FP and AP</li> <li>▪ Plumage quality is a valid indicator of SFP</li> <li>▪ Less FP perches vs. wire or litter floor</li> </ul>                                                                                                                                                                          |
| <b>Genotype</b>                        |                                                                                                                                                                                                             |                                                                             |                                                                                                                                                                                                            |                                                                                                                                                                                                                                                                                                                                                                                                                                 |
| <b>Kjaer, 2000 [14]</b>                | Observation of behavior and integument condition for two full laying cycles in four hybrid strains (two WL type, two medium heavy type).                                                                    | <i>Gallus gallus domesticus</i> (LSL and NB (WL), LB and ISA)               | <ul style="list-style-type: none"> <li>▪ Behavior</li> <li>▪ Plumage quality</li> <li>▪ Skin quality</li> <li>▪ Keel bone</li> <li>▪ Bumble foot</li> <li>▪ BW</li> <li>▪ Beak length and curve</li> </ul> | <ul style="list-style-type: none"> <li>▪ Medium heavy strains more FP than WL strains</li> <li>▪ ISA more FP than LB</li> <li>▪ No effect of strain on overall bout size or pecks per bout</li> <li>▪ Tail directed bout size longer than for other body parts</li> <li>▪ Dorsal directed bout size longer for WL than for other strains</li> <li>▪ Ventral directed bout size higher for LSL than for other strains</li> </ul> |
| <b>Kjaer &amp; Sorensen, 2002 [15]</b> | <ul style="list-style-type: none"> <li>▪ Genotype * (high vs. low) level of dietary methionine + cystine</li> <li>▪ 3 Genotypes, 2 levels of light intensity, 2 ages of access to the range area</li> </ul> | <i>Gallus gallus domesticus</i> (ISA, NH, WL and a cross between NH and WL) | <ul style="list-style-type: none"> <li>▪ Behavior</li> <li>▪ Plumage quality</li> <li>▪ Age</li> <li>▪ Health status of foot and comb</li> <li>▪ Mortality</li> <li>▪ Egg production</li> </ul>            | <ul style="list-style-type: none"> <li>▪ Minor effect on pecking behavior: <ul style="list-style-type: none"> <li>- Dietary level of methionine + cystine</li> <li>- Light intensity during rearing</li> <li>- Age at access to the range area</li> </ul> </li> <li>▪ Substantial variation in FP between batches</li> <li>▪ Correlation high FP and high mortality from cannibalism</li> </ul>                                 |

| Reference                          | Experiment                                                                                                                                                                                                                  | Subjects                                                             | Measured                                                                                                                                                                             | Results / Conclusion(s)                                                                                                                                                                                                                                                                                                                                                                                                                                                                                                                                |
|------------------------------------|-----------------------------------------------------------------------------------------------------------------------------------------------------------------------------------------------------------------------------|----------------------------------------------------------------------|--------------------------------------------------------------------------------------------------------------------------------------------------------------------------------------|--------------------------------------------------------------------------------------------------------------------------------------------------------------------------------------------------------------------------------------------------------------------------------------------------------------------------------------------------------------------------------------------------------------------------------------------------------------------------------------------------------------------------------------------------------|
|                                    |                                                                                                                                                                                                                             |                                                                      | <ul style="list-style-type: none"> <li>▪ Floor eggs</li> <li>▪ Egg weight</li> <li>▪ Shell quality</li> <li>▪ Temperature</li> <li>▪ Humidity</li> </ul>                             |                                                                                                                                                                                                                                                                                                                                                                                                                                                                                                                                                        |
| <b>Rodenburg et al., 2003 [16]</b> | <ul style="list-style-type: none"> <li>▪ OF test</li> <li>▪ Social test</li> </ul>                                                                                                                                          | <i>Gallus gallus domesticus</i>                                      | <ul style="list-style-type: none"> <li>▪ Behavior</li> <li>▪ Body weight</li> <li>▪ Heritability (<math>h^2</math>, estimate sire and dam variances) of behavioral traits</li> </ul> | <p>GFP and OF behaviors found heritable, may be used in selection against FP:</p> <ul style="list-style-type: none"> <li>- <math>h^2</math> were higher at 5 wks. compared to 29 wks. for OF behaviors</li> <li>- <math>h^2</math> were higher at 30 wks. compared to 6 wks. for GFP, ground pecking and BW in social test</li> <li>- <math>h^2</math> estimate for SFP was not significantly different from zero at either age</li> </ul>                                                                                                             |
| <b>Bolhuis et al., 2009 [17]</b>   | <ul style="list-style-type: none"> <li>▪ 2*2 Factorial design: genetic line (group-selected against mortality or control) * BT / non-BT</li> <li>▪ Physical restraint test</li> <li>▪ Sudden human approach test</li> </ul> | <i>Gallus gallus domesticus</i> (WL; low mortality and control line) | <ul style="list-style-type: none"> <li>▪ Behavior</li> <li>▪ Plumage quality</li> <li>▪ Plasma-CORT</li> <li>▪ 5-HT</li> <li>▪ Platelet 5-HT uptake</li> </ul>                       | <ul style="list-style-type: none"> <li>- Low mortality line showed less fear-related behavior than control</li> <li>- Low mortality line showed higher 5-HT and lower platelet 5-HT uptake: possible differences in functional activity of the 5-HT system</li> <li>- Negative effect of BT on fear and PD</li> <li>- No effect of BT on peripheral 5-HT: fearfulness and 5-HT activity possibly related to FP, without distinguishing between cause and effect.</li> <li>▪ Peripheral 5-HT activity may reflect the predisposition for SFP</li> </ul> |

| Reference                    | Experiment                                                                                                                                                                                                                                                                                                                                   | Subjects                                                        | Measured                                                                                                                                                                                                                                         | Results / Conclusion(s)                                                                                                                                                                                                                                                                                                                                                                                                                                                                                                                     |
|------------------------------|----------------------------------------------------------------------------------------------------------------------------------------------------------------------------------------------------------------------------------------------------------------------------------------------------------------------------------------------|-----------------------------------------------------------------|--------------------------------------------------------------------------------------------------------------------------------------------------------------------------------------------------------------------------------------------------|---------------------------------------------------------------------------------------------------------------------------------------------------------------------------------------------------------------------------------------------------------------------------------------------------------------------------------------------------------------------------------------------------------------------------------------------------------------------------------------------------------------------------------------------|
| Kjaer & Jorgensen, 2011 [18] | <ul style="list-style-type: none"> <li>▪ Physical restraint test</li> <li>▪ Social test</li> </ul>                                                                                                                                                                                                                                           | <i>Gallus gallus domesticus</i> (WL; HFP, LFP and control)      | <ul style="list-style-type: none"> <li>▪ HRV (by ECG)</li> <li>▪ Sympathovagal balance (by using pharmacological blockades to selectively inhibit the regulatory influences of the different branches of the ANS on cardiac activity)</li> </ul> | <ul style="list-style-type: none"> <li>▪ Significant ANS response induced by both physical restraint and social test</li> <li>▪ Effect physical restraint strongest on HFP line, than on control resp. LFP line (i.e. selection for FP increased the ANS response to physical restraint)</li> <li>▪ Effect social test stronger on HFP line and control, than on LFP line (i.e. selection against FP reduced the ANS reaction to increased social contact)</li> <li>▪ Physical restraint higher stress reaction than social test</li> </ul> |
| de Haas et al., 2014 [19]    | <ul style="list-style-type: none"> <li>• Relate behavior and physiological parameters (PD, plasma-CORT and 5-HT) of PS to high levels of SFP and anxiety in offspring</li> <li>• Offspring: housing system (open, partly open, closed) * litter conditions (limitation of litter (yes/no) * disruption of litter supply (yes/no))</li> </ul> | <i>Gallus gallus domesticus</i> (DW (WL) and ISA (RIR and RIW)) | <ul style="list-style-type: none"> <li>▪ Behavior</li> <li>▪ Plumage quality</li> <li>▪ Basal plasma-CORT</li> <li>▪ 5-HT levels</li> </ul>                                                                                                      | <ul style="list-style-type: none"> <li>▪ Effect of PS strain on anxiety and SFP in offspring (highest for DW hybrid):</li> <li>▪ DW: Positive correlation between PS (CORT, PD, 5-HT) and offspring anxiety and SFP</li> <li>▪ Positive effect of disruption and limitation of litter supply during rearing on anxiety and SFP in offspring (highest for ISA hybrid)</li> </ul>                                                                                                                                                             |

| Reference                      | Experiment                                                                                                                                                                                                                                                    | Subjects                                          | Measured                                                                                                                                                                                                                      | Results / Conclusion(s)                                                                                                                                                                                                                                                                                                                                                                                                              |
|--------------------------------|---------------------------------------------------------------------------------------------------------------------------------------------------------------------------------------------------------------------------------------------------------------|---------------------------------------------------|-------------------------------------------------------------------------------------------------------------------------------------------------------------------------------------------------------------------------------|--------------------------------------------------------------------------------------------------------------------------------------------------------------------------------------------------------------------------------------------------------------------------------------------------------------------------------------------------------------------------------------------------------------------------------------|
|                                | <ul style="list-style-type: none"> <li>• NO test</li> <li>• Stationary person test</li> <li>• Social isolation test</li> </ul>                                                                                                                                |                                                   |                                                                                                                                                                                                                               |                                                                                                                                                                                                                                                                                                                                                                                                                                      |
| van der Eijk et al., 2019 [20] | <ul style="list-style-type: none"> <li>▪ Measures of innate and adaptive immune characteristics in HFP and LFP lines</li> <li>▪ Test whether differences in immune characteristics were reflected in the relative abundance of immune cell subsets</li> </ul> | <i>Gallus gallus domesticus</i> (WL; HFP and LFP) | <ul style="list-style-type: none"> <li>▪ Behavior</li> <li>▪ Nitric oxide production by blood derived monocytes</li> <li>▪ SpAb titers to HuSA</li> <li>▪ IgM and IgG N(A)Ab titers</li> <li>▪ Immune cell subsets</li> </ul> | <ul style="list-style-type: none"> <li>▪ Divergent selection on FP affects different arms of the immune system: <ul style="list-style-type: none"> <li>- Higher nitric oxide production, higher IgM and IgG specific antibody titers and higher IgG natural (auto)antibody titers) in HFP than in LFP line</li> </ul> </li> <li>▪ No effect of divergent selection on FP on the relative abundance of immune cell subsets</li> </ul> |
| Piepho et al., 2017 [21]       | <ul style="list-style-type: none"> <li>▪ Analyze data on SFP of seven lines of HFP and LFP and their F<sub>2</sub>-cross.</li> <li>▪ Fit a two-component mixture of Poisson distributions to uncover hidden sub-groups of EFP birds.</li> </ul>               | <i>Gallus gallus domesticus</i> (WL; HFP and LFP) | <ul style="list-style-type: none"> <li>▪ Behavior</li> <li>- Bouts per bird (bpb)</li> </ul>                                                                                                                                  | <ul style="list-style-type: none"> <li>▪ Line effect on mean bpb</li> <li>▪ Proportion of EFP in LFP marginal compared to HFP and F<sub>2</sub>-cross</li> <li>▪ EFP also present in LFP</li> <li>▪ SFP in layer flocks is not a homogenous behavior</li> </ul>                                                                                                                                                                      |
| Iffland et al., 2019 [22]      | <ul style="list-style-type: none"> <li>▪ Fit of mixture of two negative binomial distributions to FP data of a F<sub>2</sub>-cross</li> </ul>                                                                                                                 | <i>Gallus gallus domesticus</i> (WL)              | <ul style="list-style-type: none"> <li>▪ Behavior</li> <li>▪ Latency (EB and TI tests)</li> </ul>                                                                                                                             | <ul style="list-style-type: none"> <li>▪ Subgroup of EFP made up about one third of the animals</li> <li>▪ EFP birds higher FP frequency and higher FP intensities than non-EFP</li> </ul>                                                                                                                                                                                                                                           |

| Reference                          | Experiment                                                                                                                                                                                                                                             | Subjects                                                        | Measured                                                                                                                                                                                                                                                                                | Results / Conclusion(s)                                                                                                                                                                                                                                                                                                                                                                                                                                                                                                                         |
|------------------------------------|--------------------------------------------------------------------------------------------------------------------------------------------------------------------------------------------------------------------------------------------------------|-----------------------------------------------------------------|-----------------------------------------------------------------------------------------------------------------------------------------------------------------------------------------------------------------------------------------------------------------------------------------|-------------------------------------------------------------------------------------------------------------------------------------------------------------------------------------------------------------------------------------------------------------------------------------------------------------------------------------------------------------------------------------------------------------------------------------------------------------------------------------------------------------------------------------------------|
|                                    | <ul style="list-style-type: none"> <li>Subsequent calculation of posterior probability for new trait (pEFP)</li> <li>TI and EB tests at juvenile and adult age</li> </ul>                                                                              |                                                                 | <ul style="list-style-type: none"> <li>Heritability (estimate) of behavioral traits</li> </ul>                                                                                                                                                                                          | <ul style="list-style-type: none"> <li>pEFP has a heritability of 0.35</li> <li>pEFP is positively correlated with the fear traits</li> </ul>                                                                                                                                                                                                                                                                                                                                                                                                   |
| <b>Phenotype</b>                   |                                                                                                                                                                                                                                                        |                                                                 |                                                                                                                                                                                                                                                                                         |                                                                                                                                                                                                                                                                                                                                                                                                                                                                                                                                                 |
| <b>Albentosa et al., 2003 [23]</b> | <ul style="list-style-type: none"> <li>NO test</li> <li>Subsequent treatment: allocation of birds (pen type) by bird type (categorized by mean distance from the NO)</li> <li>Feather bundle tests (loose feather test, fixed feather test)</li> </ul> | <i>Gallus gallus domesticus</i> (ISA)                           | <ul style="list-style-type: none"> <li>Behavior               <ul style="list-style-type: none"> <li>- FP</li> <li>- AP</li> </ul> </li> <li>Plumage quality</li> <li>Mean distance from the NO</li> </ul>                                                                              | <ul style="list-style-type: none"> <li>No correlation between response to NO and FP</li> <li>In pen type 'varied range of responses to NO' more birds performed FP, FP more consistent and more environmental pecking than in pen type 'similar responses to NO'</li> </ul>                                                                                                                                                                                                                                                                     |
| <b>de Haas et al., 2013 [24]</b>   | <ul style="list-style-type: none"> <li>NO test</li> <li>Stationary person test</li> </ul>                                                                                                                                                              | <i>Gallus gallus domesticus</i> (DW (WL) and ISA (RIR and RIW)) | <ul style="list-style-type: none"> <li>Behavior</li> <li>Plumage quality</li> <li>Basal plasma-CORT</li> <li>whole-blood 5-HT levels</li> <li>Group size</li> <li>Production parameters               <ul style="list-style-type: none"> <li>- Laying percentage</li> </ul> </li> </ul> | <ul style="list-style-type: none"> <li>DW more fearful of stationary person than ISA</li> <li>DW more PD than ISA</li> <li>DW lower 5-HT levels than ISA</li> <li>Genotypes did not differ in CORT</li> <li>High CORT associated with low egg weight</li> <li>ISA: large group size associated with low feed intake and better feed conversion</li> <li>ISA: high fear of the stationary person associated with high mortality</li> <li>DW: high fear of the NO associated with low body weight, low egg weight, and low feed intake</li> </ul> |

| Reference                                   | Experiment                                                                                                                    | Subjects                                                 | Measured                                                                                                                                                                                                     | Results / Conclusion(s)                                                                                                                                                                                                                                                                                                                                                                                                                                                                                                                                                                                   |
|---------------------------------------------|-------------------------------------------------------------------------------------------------------------------------------|----------------------------------------------------------|--------------------------------------------------------------------------------------------------------------------------------------------------------------------------------------------------------------|-----------------------------------------------------------------------------------------------------------------------------------------------------------------------------------------------------------------------------------------------------------------------------------------------------------------------------------------------------------------------------------------------------------------------------------------------------------------------------------------------------------------------------------------------------------------------------------------------------------|
|                                             |                                                                                                                               |                                                          | <ul style="list-style-type: none"> <li>- Egg weight</li> <li>- Feed intake</li> <li>- Feed conversion</li> <li>- Hen body weight</li> <li>- Mortality</li> <li>- Occurrences of smothering events</li> </ul> |                                                                                                                                                                                                                                                                                                                                                                                                                                                                                                                                                                                                           |
| <b>Physiology</b>                           |                                                                                                                               |                                                          |                                                                                                                                                                                                              |                                                                                                                                                                                                                                                                                                                                                                                                                                                                                                                                                                                                           |
| <p><b>van Hierden et al., 2004 [25]</b></p> | <ul style="list-style-type: none"> <li>▪ Different doses of S-15535 * HFP / LFP</li> <li>▪ Physical restraint test</li> </ul> | <p><i>Gallus gallus domesticus</i> (WL; HFP and LFP)</p> | <ul style="list-style-type: none"> <li>▪ Behavior</li> <li>▪ 5-HT and 5-HT metabolite levels</li> <li>▪ DA and DA metabolites levels</li> </ul>                                                              | <ul style="list-style-type: none"> <li>▪ S-15535 useful tool for reducing 5-HT turnover in the forebrain of LFP and HFP chicks</li> <li>▪ HFP and LFP similar 5-HT turnover levels (suggesting a comparable number or sensitivity of presynaptic 5-HT 1A autoreceptors)</li> <li>▪ 4.0 mg/kg S-15535 was the most effective dose (without affecting DA turnover)</li> <li>▪ HFP showed higher proactivity during the physical constraint test</li> <li>▪ Acute S-15535 injection increased FP in HFP birds</li> <li>▪ Thus, low serotonergic neurotransmission modulates the performance of FP</li> </ul> |

| Reference                           | Experiment                                                                                                                                                                                                                                                                                                                                     | Subjects                                                             | Measured                                                                                                                                                                                                                                   | Results / Conclusion(s)                                                                                                                                                                                                                                                                                                                                                                                                                                                                                                                   |
|-------------------------------------|------------------------------------------------------------------------------------------------------------------------------------------------------------------------------------------------------------------------------------------------------------------------------------------------------------------------------------------------|----------------------------------------------------------------------|--------------------------------------------------------------------------------------------------------------------------------------------------------------------------------------------------------------------------------------------|-------------------------------------------------------------------------------------------------------------------------------------------------------------------------------------------------------------------------------------------------------------------------------------------------------------------------------------------------------------------------------------------------------------------------------------------------------------------------------------------------------------------------------------------|
| <b>Parmentier et al., 2009 [26]</b> | Intratracheal (i.t.) immunization by concurrent intratracheal primary (at 7 wk of age) and secondary (at 13 wk) challenges of layers with (protein antigen HuSA (1 / 0.5 / 0.01 mg / control) and pathogen-associated molecular pattern LPS (0.1 / 0.5 / 0.01 mg / control)), followed (at 11mo) by challenge of 0.01 mg HuSA + 0.5 mg of LPS. | <i>Gallus gallus domesticus</i> (LSL (WL))                           | <ul style="list-style-type: none"> <li>▪ Plumage quality</li> <li>▪ Body condition</li> <li>▪ Egg production</li> <li>▪ Humoral Immune Response to HuSA and LPS</li> <li>▪ Total antibody (Ab) titers to HuSA and LPS in plasma</li> </ul> | <ul style="list-style-type: none"> <li>▪ I.t. immunization with a high dosage of HuSA (for all doses of LPS) more PD and less wounds in vent region than birds not receiving HuSA.</li> <li>▪ I.t. immunization with a high dosage of LPS correlated to comb damage</li> <li>▪ Thus, stimulation of specific (humoral) immune responses (to HuSA) rather than innate responses (to LPS) at a young age may predispose layers for FP at later ages.</li> <li>▪ Involvement of immune mechanisms in FP or vent damage may differ</li> </ul> |
| <b>Kops et al., 2013 [27]</b>       | Measure of brain monoamine levels in four brain areas (medial striatum, hippocampus, dorsal thalamus and arcopallium) for phenotypes (SPFs, victims, non-FPs).<br>Physical restraint test                                                                                                                                                      | <i>Gallus gallus domesticus</i> (WL; low mortality and control line) | <ul style="list-style-type: none"> <li>▪ Behavior</li> <li>▪ 5-HT and 5-HT metabolite levels</li> <li>▪ DA and DA metabolites levels</li> </ul>                                                                                            | <ul style="list-style-type: none"> <li>▪ Serotonergic neurotransmission in the dorsal thalamus and striatum depends on FP phenotype: <ul style="list-style-type: none"> <li>- SFPs and victims higher 5-HT in dorsal thalamus than non-FPs</li> <li>- Non-FPs highest 5-HT in the medial striatum, then SPFs and victims resp.</li> <li>- No effect of phenotype on 5-HT in arcopallium or hippocampus</li> <li>- No effect of phenotype on DA in any of the four brain areas</li> </ul> </li> </ul>                                      |
| <b>Behavior</b>                     |                                                                                                                                                                                                                                                                                                                                                |                                                                      |                                                                                                                                                                                                                                            |                                                                                                                                                                                                                                                                                                                                                                                                                                                                                                                                           |

| Reference                                   | Experiment                                                                                                                                                                        | Subjects                                                 | Measured                                                                                                                                                                                                       | Results / Conclusion(s)                                                                                                                                                                                                                                                                                                                                                                                                                                                                                                                                                                                                                                                                                                                                                                                                                                                                                                                                                                                       |
|---------------------------------------------|-----------------------------------------------------------------------------------------------------------------------------------------------------------------------------------|----------------------------------------------------------|----------------------------------------------------------------------------------------------------------------------------------------------------------------------------------------------------------------|---------------------------------------------------------------------------------------------------------------------------------------------------------------------------------------------------------------------------------------------------------------------------------------------------------------------------------------------------------------------------------------------------------------------------------------------------------------------------------------------------------------------------------------------------------------------------------------------------------------------------------------------------------------------------------------------------------------------------------------------------------------------------------------------------------------------------------------------------------------------------------------------------------------------------------------------------------------------------------------------------------------|
| <p><b>Van Hierden et al., 2002 [28]</b></p> | <p>Observe and compare behavior of chicks from HFP and LFP lines during the first 8 weeks of life.</p>                                                                            | <p><i>Gallus gallus domesticus</i> (WL; HFP and LFP)</p> | <p>Behavior</p>                                                                                                                                                                                                | <ul style="list-style-type: none"> <li>▪ Line differences in FP behavior can be observed from a very early age during development</li> <li>▪ Line effects targeting of pecking behavior               <ul style="list-style-type: none"> <li>- HFP chicks showed more GFP than LFP</li> <li>- HFP showed more preening than LFP</li> <li>- LFP showed longer duration foraging and feeding behaviors than HFP</li> <li>- HFP showed negative correlation between GFP and preening</li> <li>- LFP showed negative correlation between GFP and duration of feeding</li> </ul> </li> <li>- Principal component analysis:               <ul style="list-style-type: none"> <li>- HFP showed high and opposite loadings on the same component for GFP and preening</li> <li>- HFP showed loadings on the other component for GFP and feeding</li> <li>- LFP showed opposite loadings on the same component for GFP and feeding</li> <li>- LFP showed the same loadings for GFP and preening</li> </ul> </li> </ul> |
| <p><b>Cloutier et al., 2002 [29]</b></p>    | <ul style="list-style-type: none"> <li>▪ Used of inanimate chicken model as cannibalism stimulus</li> <li>▪ Demonstrators were trained to pierce a membrane covering a</li> </ul> | <p><i>Gallus gallus domesticus</i> (WL)</p>              | <ul style="list-style-type: none"> <li>▪ Behavior               <ul style="list-style-type: none"> <li>- Peck latency</li> <li>- Pierce latency</li> </ul> </li> <li>▪ Amount of blood disappearing</li> </ul> | <ul style="list-style-type: none"> <li>▪ Social learning can contribute to the spread of cannibalistic behavior in domestic fowl</li> <li>▪ Observing demonstrator piercing membrane and consuming blood increased likelihood of performing this task</li> </ul>                                                                                                                                                                                                                                                                                                                                                                                                                                                                                                                                                                                                                                                                                                                                              |

| Reference                                     | Experiment                                                                                                                                                                                                                | Subjects                                          | Measured                                                                                                              | Results / Conclusion(s)                                                                                                                                                                                                                                                                                                                                                                                                                                                                                                                                    |
|-----------------------------------------------|---------------------------------------------------------------------------------------------------------------------------------------------------------------------------------------------------------------------------|---------------------------------------------------|-----------------------------------------------------------------------------------------------------------------------|------------------------------------------------------------------------------------------------------------------------------------------------------------------------------------------------------------------------------------------------------------------------------------------------------------------------------------------------------------------------------------------------------------------------------------------------------------------------------------------------------------------------------------------------------------|
|                                               | <p>dish of chicken blood and consume the blood</p> <ul style="list-style-type: none"> <li>Two observer treatments: observe stimulus through a wire mesh partition / observe stimulus within the same enclosure</li> </ul> |                                                   | <p>from the model during the test</p> <ul style="list-style-type: none"> <li>Chicken model membrane damage</li> </ul> | <ul style="list-style-type: none"> <li>Direct access to the cannibalism stimulus enhanced learning of the task where observing it through a wire mesh partition did not</li> <li>Direct access to the cannibalism stimulus during demonstrations enhanced blood consumption during tests</li> <li>Observing demonstrator performing task and direct access to the cannibalism stimulus during demonstrations resulted in bigger holes made in the membrane during tests</li> <li>Individual learning occurred in the absence of social learning</li> </ul> |
| <b>Forkman et al., 2004 [30]</b>              | <ul style="list-style-type: none"> <li>SFP performing birds / non-FP birds, HFP /LFP lines</li> <li>Owner-intruder test</li> <li>NO test</li> </ul>                                                                       | Not specified                                     | <ul style="list-style-type: none"> <li>Behavior</li> </ul>                                                            | <ul style="list-style-type: none"> <li>FP did not predict agonistic behavior in owner-intruder test</li> <li>non-FP showed less fear and distance to 'intruder'</li> <li>FP did not predict latency to approach the NO test</li> <li>non-FP showed more rapid habituation during NO test</li> <li>HFP more aggressive more aggressive hopping, pecking and kicking than LFP</li> <li>HFP came closer to the NO</li> <li>Line did not predict habituation during NO test</li> </ul>                                                                         |
| <b>Harlander-Matauschek et al., 2007 [31]</b> | Observe preference for mash / wood shavings / downy feathers / empty bowl for: Management system (cage /                                                                                                                  | <i>Gallus gallus domesticus</i> (WL; HFP and LFP) | <ul style="list-style-type: none"> <li>Behavior</li> <li>- Amount of substrate eaten</li> </ul>                       | <ul style="list-style-type: none"> <li>Hens were motivated to eat feathers and wood shavings</li> <li>HFP birds have a stronger preference for feathers than LFP birds</li> </ul>                                                                                                                                                                                                                                                                                                                                                                          |

| Reference | Experiment                                                             | Subjects | Measured                                                                                                                                                                                                                                                                                | Results / Conclusion(s)                                                                                                                                                                                                                                                   |
|-----------|------------------------------------------------------------------------|----------|-----------------------------------------------------------------------------------------------------------------------------------------------------------------------------------------------------------------------------------------------------------------------------------------|---------------------------------------------------------------------------------------------------------------------------------------------------------------------------------------------------------------------------------------------------------------------------|
|           | litter) * Line (HFP / LFP) * State (food-deprived / non-food deprived) |          | <ul style="list-style-type: none"> <li>- Total duration of pecking into the bowls, manipulating and eating the substrates</li> <li>- Latency to first movement to peck into or eat from the different substrates</li> <li>- The number of visits to the different substrates</li> </ul> | <ul style="list-style-type: none"> <li>- No effect of line on preference for wood shavings</li> <li>- Caged ate more shavings and visited shavings more than floor pen</li> <li>- Food deprived HFP and non-food deprived caged HFP ate more feathers than LFP</li> </ul> |

## References

1. Blokhuis, H.J.; Van Der Haar, J.W. Effects of floor type during rearing and of beak trimming on ground pecking and feather pecking in laying hens. *Appl. Anim. Behav. Sci.* **1989**, *22*, 359–369.
2. El-Lethey, H.; Aerni, V.; Jungi, T.W.; Wechsler, B. Stress and feather pecking in laying hens in relation to housing conditions. *Br. Poult. Sci.* **2000**, *41*, 22–28.
3. Riedstra, B.; Groothuis, T.G.G. Prenatal light exposure affects early feather-pecking behaviour in the domestic chick. *Anim. Behav.* **2004**, *67*, 1037–1042.
4. van Hierden, Y.M.; Koolhaas, J.M.; Korte, S.M. Chronic increase of dietary l-tryptophan decreases gentle feather pecking behaviour. *Appl. Anim. Behav. Sci.* **2004**, *89*, 71–84.
5. Chow, A.; Hogan, J.A. The development of feather pecking in Burmese red junglefowl: the influence of early experience with exploratory-rich environments. *Appl. Anim. Behav. Sci.* **2005**, *93*, 283–294.
6. McAdie, T.M.; Keeling, L.J.; Blokhuis, H.J.; Jones, R.B. Reduction in feather pecking and improvement of feather condition with the presentation of a string device to chickens. *Appl. Anim. Behav. Sci.* **2005**, *93*, 67–80.
7. Zimmerman, P.H.; Lindberg, A.C.; Pope, S.J.; Glen, E.; Bolhuis, J.E.; Nicol, C.J. The effect of stocking density, flock size and modified management on laying hen behaviour and welfare in a non-cage system. *Appl. Anim. Behav. Sci.* **2006**, *101*, 111–124.
8. Dixon, L.M.; Duncan, I.J.H.; Mason, G. What's in a peck? Using fixed action pattern morphology to identify the motivational basis of abnormal feather-pecking behaviour. *Anim. Behav.* **2008**, *76*, 1035–1042.
9. Lambton, S.L.; Knowles, T.G.; Yorke, C.; Nicol, C.J. The risk factors affecting the development of gentle and severe feather pecking in loose housed laying hens. *Appl. Anim. Behav. Sci.* **2010**, *123*, 32–42.
10. Collins, L.M.; Asher, L.; Pfeiffer, D.U.; Browne, W.J.; Nicol, C.J. Clustering and synchrony in laying hens: The effect of environmental resources on social dynamics. *Appl. Anim. Behav. Sci.* **2011**, *129*, 43–53.
11. Gilani, A.-M.; Knowles, T.G.; Nicol, C.J. The effect of dark brooders on feather pecking on commercial farms. *Appl. Anim. Behav. Sci.* **2012**, *142*, 42–50.
12. Hartcher, K.M.; Tran, K.T.N.; Wilkinson, S.J.; Hemsworth, P.H.; Thomson, P.C.; Cronin, G.M. The effects of environmental enrichment and beak-trimming during the rearing period on subsequent feather damage due to feather-pecking in laying hens. *Poult. Sci.* **2015**, *94*, 852–859.
13. Zepp, M.; Louton, H.; Erhard, M.; Schmidt, P.; Helmer, F.; Schwarzer, A. The influence of stocking density and enrichment on the occurrence of feather pecking and aggressive pecking behavior in laying hen chicks. *J. Vet. Behav.* **2018**, *24*, 9–18.
14. Kjaer, J.B. Diurnal rhythm of feather pecking behaviour and condition of integument in four strains of loose housed laying hens. *Appl. Anim. Behav. Sci.* **2000**, *65*, 331–347.
15. Kjaer, J.B.; Sørensen, P. Feather pecking and cannibalism in free-range laying hens as affected by genotype, dietary level of methionine + cystine, light intensity during rearing and age at first access to the range area. *Appl. Anim. Behav. Sci.* **2002**, *19*.
16. Rodenburg, T.; Buitenhuis, A.; Ask, B.; Uitdehaag, K.; Koene, P.; van der Poel, J.; Bovenhuis, H. Heritability of feather pecking and open-field response of laying hens at two different ages. *Poult. Sci.* **2003**, *82*, 861–867.
17. Bolhuis, J.E.; Ellen, E.D.; Van Reenen, C.G.; De Groot, J.; Napel, J.T.; Koopmanschap, R.E.; De Vries Reilingh, G.; Uitdehaag, K.A.; Kemp, B.; Rodenburg, T.B. Effects of genetic group selection against mortality on behavior and peripheral serotonin in domestic laying hens with trimmed and intact beaks. *Physiol. Behav.* **2009**, *97*, 470–475.

18. Kjaer, J.B.; Jørgensen, H. Heart rate variability in domestic chicken lines genetically selected on feather pecking behavior. *Genes Brain Behav.* **2011**, *10*, 747–755.
19. de Haas, E.N.; Bolhuis, J.E.; Kemp, B.; Groothuis, T.G.G.; Rodenburg, T.B. Parents and Early Life Environment Affect Behavioral Development of Laying Hen Chickens. *PLoS ONE* **2014**, *9*, e90577.
20. van der Eijk, J.A.J.; Verwoolde, M.B.; de Vries Reilingh, G.; Jansen, C.A.; Rodenburg, T.B.; Lammers, A. Chicken lines divergently selected on feather pecking differ in immune characteristics. *Physiol. Behav.* **2019**, *212*, 112680.
21. Piepho, H.-P.; Lutz, V.; Kjaer, J.B.; Grashorn, M.; Bennewitz, J.; Bessei, W. The presence of extreme feather peckers in groups of laying hens. *animal* **2017**, *11*, 500–506.
22. Iffland, H.; Wellmann, R.; Preuß, S.; Tetens, J.; Bessei, W.; Piepho, H.-P.; Bennewitz, J. A Novel Model to Explain Extreme Feather Pecking Behavior in Laying Hens. *Behav. Genet.* **2019**.
23. Albertosa, M.J.; Glen, E.; Leeb, C.; Whittaker, X.; Nicol, C.J. An evaluation of response to novelty as a predictor of pecking tendency in laying hens. *Appl. Anim. Behav. Sci.* **2003**, *82*, 313–328.
24. de Haas, E.N.; Kemp, B.; Bolhuis, J.E.; Groothuis, T.; Rodenburg, T.B. Fear, stress, and feather pecking in commercial white and brown laying hen parent-stock flocks and their relationships with production parameters. *Poult. Sci.* **2013**, *92*, 2259–2269.
25. van Hierden, Y.M.; de Boer, S.F.; Koolhaas, J.M.; Korte, S.M. The Control of Feather Pecking by Serotonin. *Behav. Neurosci.* **2004**, *118*, 575–583.
26. Parmentier, H.K.; Rodenburg, T.B.; De Vries Reilingh, G.; Beerda, B.; Kemp, B. Does enhancement of specific immune responses predispose laying hens for feather pecking? *Poult. Sci.* **2009**, *88*, 536–542.
27. Kops, M.S.; de Haas, E.N.; Rodenburg, T.B.; Ellen, E.D.; Korte-Bouws, G.A.H.; Olivier, B.; Güntürkün, O.; Bolhuis, J.E.; Korte, S.M. Effects of feather pecking phenotype (severe feather peckers, victims and non-peckers) on serotonergic and dopaminergic activity in four brain areas of laying hens (*Gallus gallus domesticus*). *Physiol. Behav.* **2013**, *120*, 77–82.
28. van Hierden, Y.M.; Korte, S.M.; Ruesink, E.W.; van Reenen, C.G.; Engel, B.; Koolhaas, J.M.; Blokhuis, H.J. The development of feather pecking behaviour and targeting of pecking in chicks from a high and low feather pecking line of laying hens. *Appl. Anim. Behav. Sci.* **2002**, *77*, 183–196.
29. Cloutier, S.; Newberry, R.C.; Honda, K.; Alldredge, J.R. Cannibalistic behaviour spread by social learning. *Anim. Behav.* **2002**, *63*, 1153–1162.
30. Forkman, B.; Heiskanen, T.; Kjær, J. 2004 SPRING MEETING OF THE WPSA UK BRANCH PAPERS: The predictions from coping theory are not upheld for severe featherpeckers. *Br. Poult. Sci.* **2004**, *45*, S34–S35.
31. Harlander-Matauschek, A.; Benda, I.; Lavetti, C.; Djukic, M.; Bessei, W. The relative preferences for wood shavings or feathers in high and low feather pecking birds. *Appl. Anim. Behav. Sci.* **2007**, *107*, 78–87.
